# Supplementary material for: Clone-Dependent Expression of Esca Disease Revealed by Leaf Metabolite Analysis
Source: Front Plant Sci. 2019 Jan 9;9:1960. doi: 10.3389/fpls.2018.01960 (PMC6333860; doi:10.3389/fpls.2018.01960)
Supplement: TABLE S2 — Temperature data. Values ± standard deviation of the average monthly temperature for each month over 10 years (2005–2014) and for 2015 with minimum and maximum temperatures (°C). [file Table_2.XLSX]

## Sheet: Feuil1
	2005-2014	2015
	Mean±SD	Mean±SD	Min	Max
January	3.2±4.3	3.5±3.5	-2.6	11.5
February	3.3±4.1	2.6±2.2	-1.3	7.3
March	6.7±3.8	6.7±2.4	2.8	11.5
April	11.1±3.3	11.2±2.9	5.2	15.9
May	14.4±3.4	14.2±2.5	8.9	19.4
June	17.9±3.3	18.8±2.9	13.1	25.4
July	19.8±3.3	22.1±4	14.6	28.8
August	18.4±2.8	20.7±3.2	15.5	26.3
September	15.4±3	14.1±1.6	11.7	17.4
October	11.8±3.9	10.4±3	4.6	16.8
November	7.1±3.8	9.4±4.5	-0.1	16
December	3.5±4.1	7.1±2.9	1.6	11.9
